# Supplementary material for: Do convection-permitting regional climate models have added value for hydroclimatic simulations? A test case over small and medium-sized catchments in Germany
Source: Copernicus journal article supplement (doi:10.5194/egusphere-2025-2943), 2025-07-02
Supplement: Supplementary file 1 [file egusphere-2025-2943-supplement.pdf]

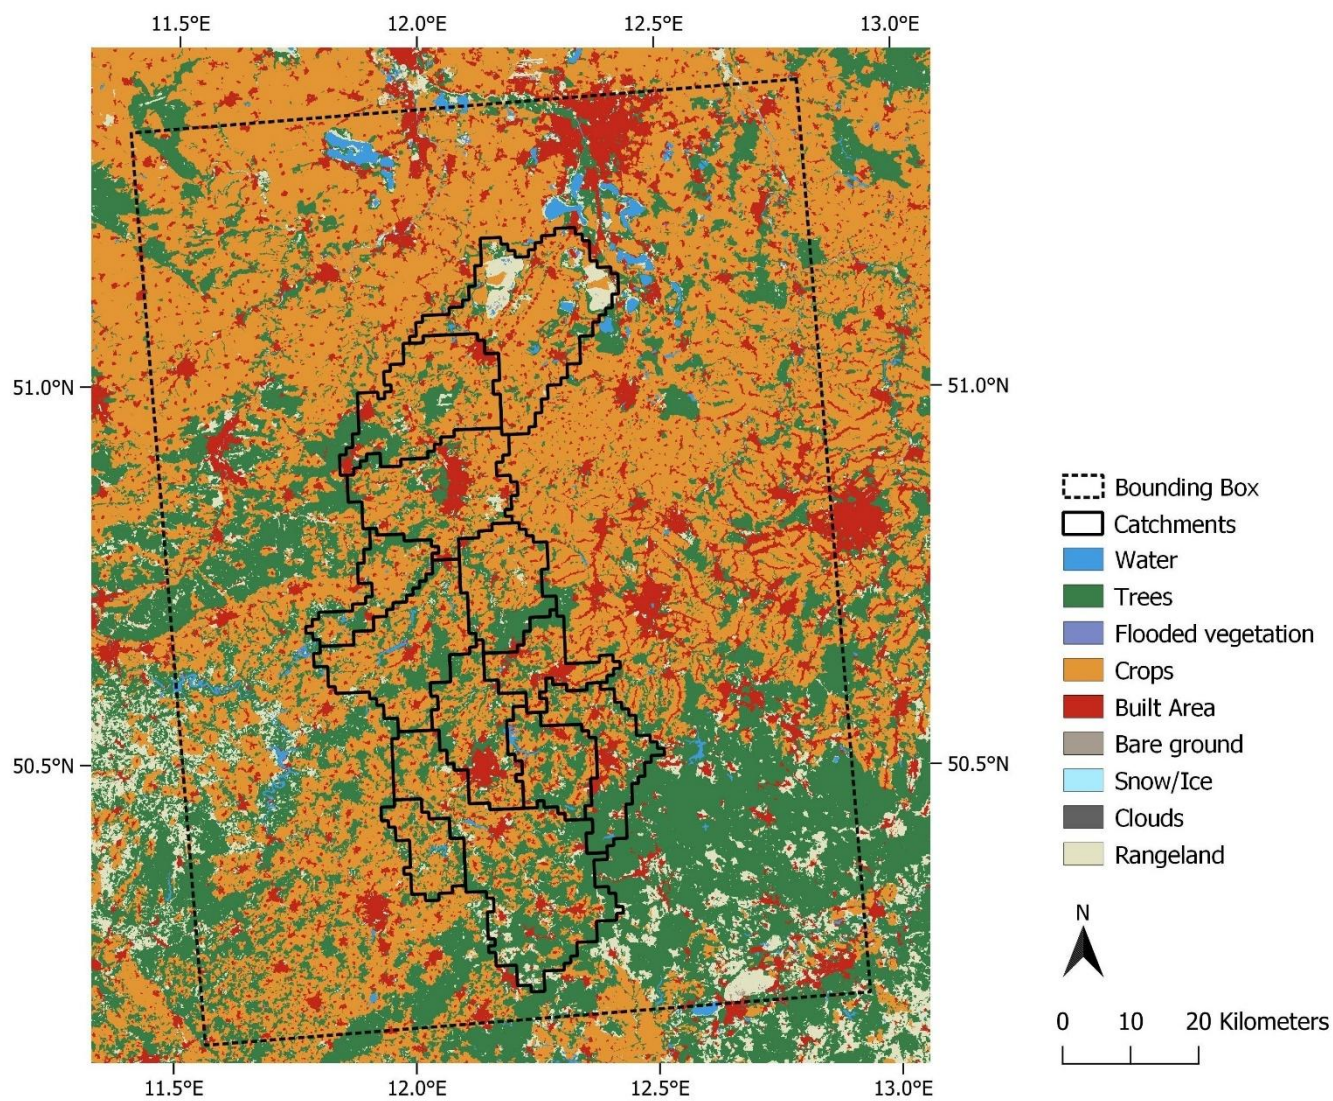

**Fig. S1: Land cover in the study area (data base: Karra et al. 2021)**

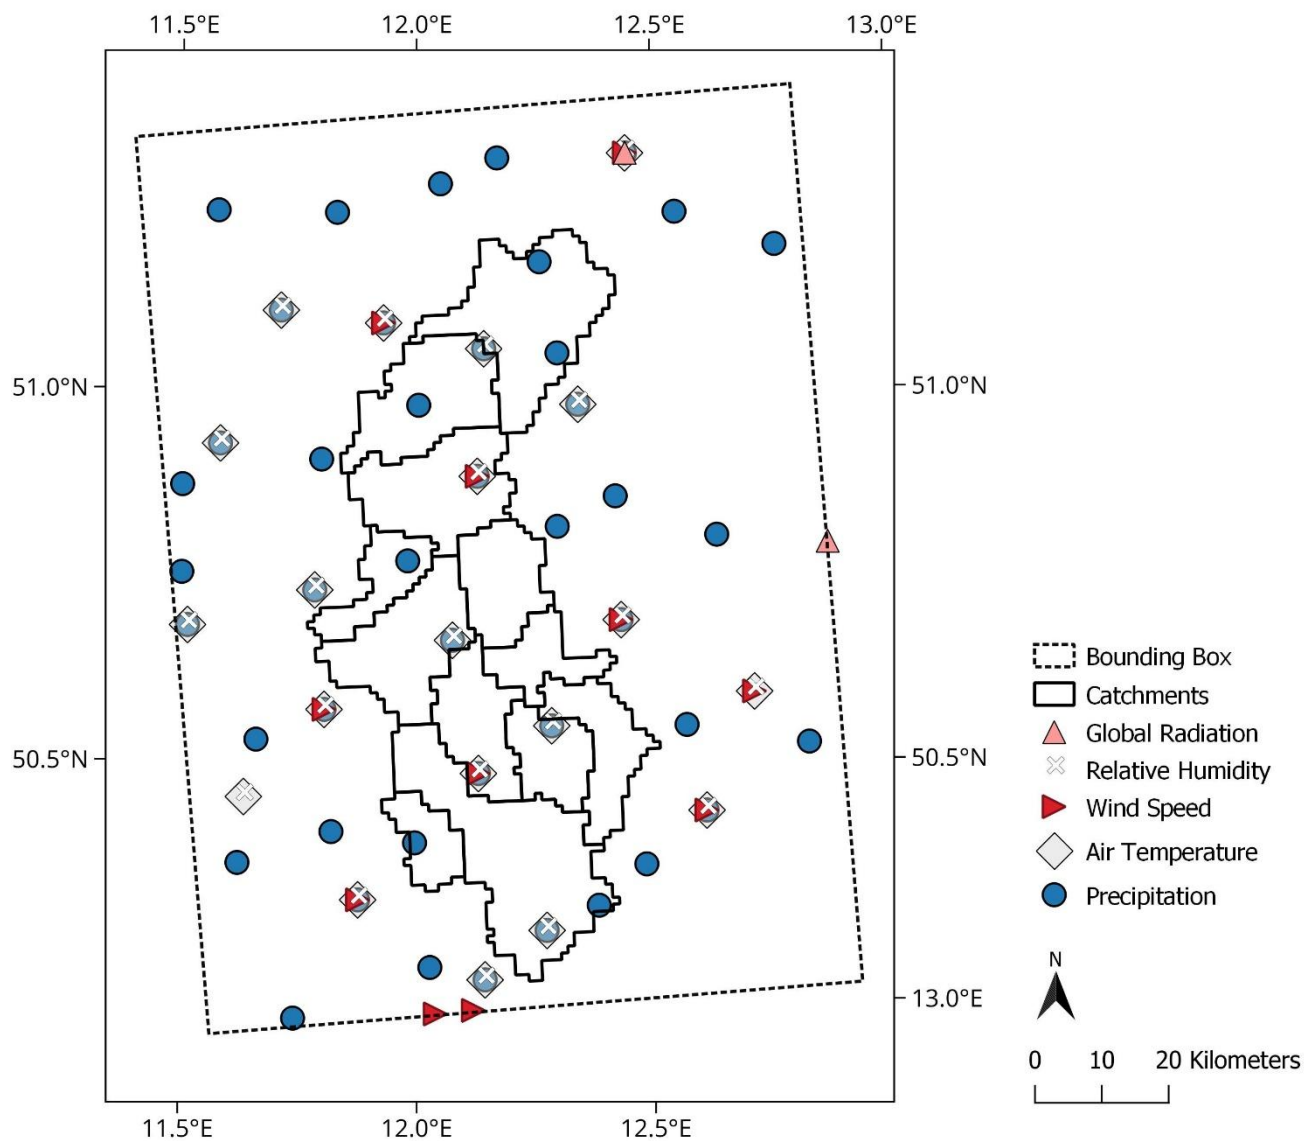

**Fig. S2: Point-based observational network within the bounding box**

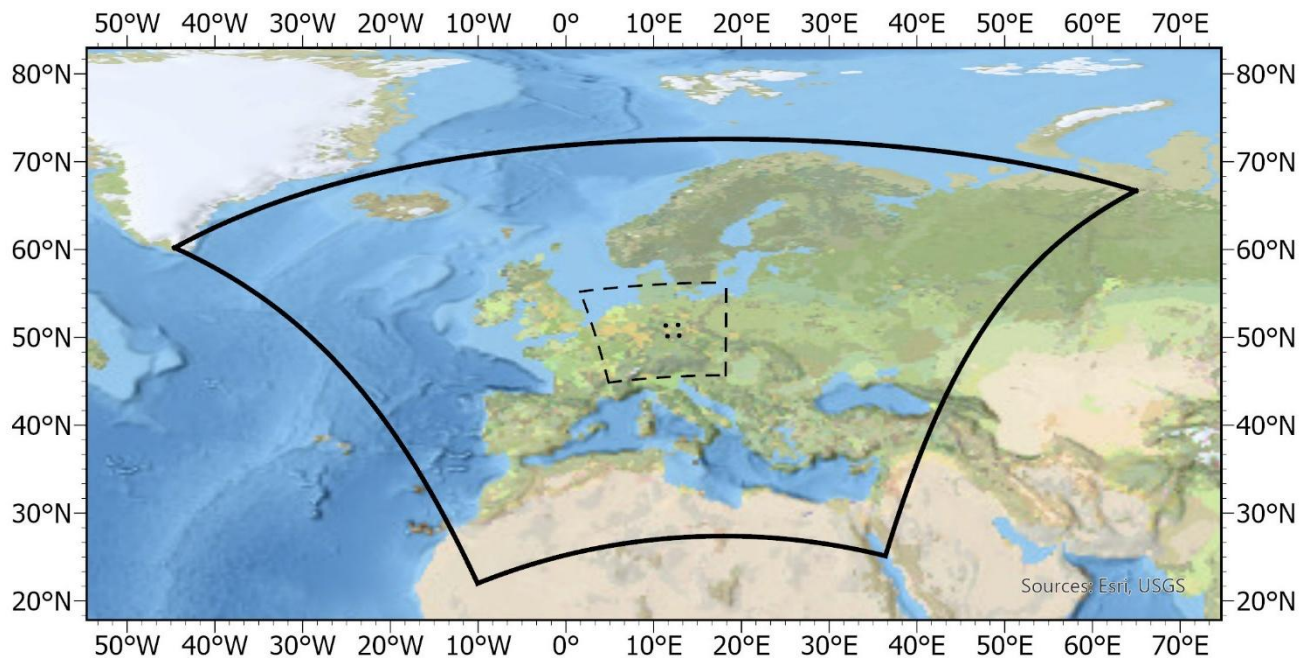

**Fig. S3: RCM EURO-domain (solid) and CPRCM CEU-domain (dashed), together with the edges of the study area (points) (sources: ESRI, USGS)**

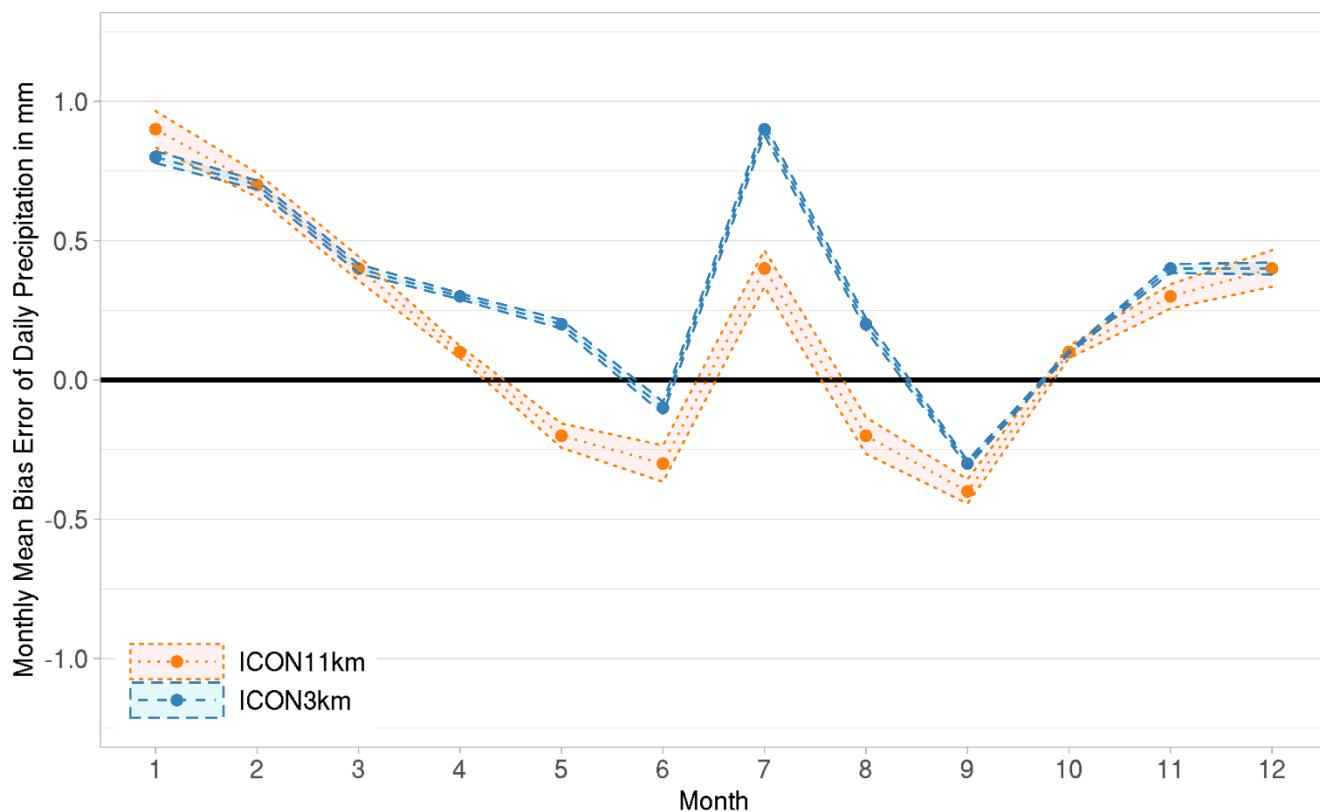

**Fig. S4: Monthly mean bias error of daily precipitation of ICON3km and ICON11km during the period 2005 to 2014, as well as the 95%-confidence intervals from the station means**
